# Supplementary material for: Assessing the impact of care pathways on potentially preventable complications and costs for spinal trauma patients: protocol for a data linkage study using cohort study and administrative data
Source: PubMed Central journal article supplement — BMJ Open. 2018 Nov 8;8(11):e023785. doi: 10.1136/bmjopen-2018-023785 (PMC6231591; doi:10.1136/bmjopen-2018-023785), 2018-11-08
Supplement: bmjopen-2018-023785.draft_revisions.pdf [file bmjopen-2018-023785.draft_revisions.pdf]

# BMJ Open

BMJ Open is committed to open peer review. As part of this commitment we make the peer review history of every article we publish publicly available.

When an article is published we post the peer reviewers' comments and the authors' responses online. We also post the versions of the paper that were used during peer review. These are the versions that the peer review comments apply to.

The versions of the paper that follow are the versions that were submitted during the peer review process. They are not the versions of record or the final published versions. They should not be cited or distributed as the published version of this manuscript.

BMJ Open is an open access journal and the full, final, typeset and author-corrected version of record of the manuscript is available on our site with no access controls, subscription charges or pay-per-view fees (<http://bmjopen.bmj.com>).

If you have any questions on BMJ Open's open peer review process please email [info.bmjopen@bmj.com](mailto:info.bmjopen@bmj.com)

# BMJ Open

## Assessing the impact of care pathways on potentially preventable complications and costs for spinal trauma patients: protocol for a data linkage study using cohort study and administrative data.

|                               |                                                                                                                                                                                                                                                                                                                                                                                                                                                                                                                                                                                                                                                                                                                                                                                              |
|-------------------------------|----------------------------------------------------------------------------------------------------------------------------------------------------------------------------------------------------------------------------------------------------------------------------------------------------------------------------------------------------------------------------------------------------------------------------------------------------------------------------------------------------------------------------------------------------------------------------------------------------------------------------------------------------------------------------------------------------------------------------------------------------------------------------------------------|
| Journal:                      | <i>BMJ Open</i>                                                                                                                                                                                                                                                                                                                                                                                                                                                                                                                                                                                                                                                                                                                                                                              |
| Manuscript ID                 | bmjopen-2018-023785                                                                                                                                                                                                                                                                                                                                                                                                                                                                                                                                                                                                                                                                                                                                                                          |
| Article Type:                 | Protocol                                                                                                                                                                                                                                                                                                                                                                                                                                                                                                                                                                                                                                                                                                                                                                                     |
| Date Submitted by the Author: | 27-Apr-2018                                                                                                                                                                                                                                                                                                                                                                                                                                                                                                                                                                                                                                                                                                                                                                                  |
| Complete List of Authors:     | Vaikuntam, Bharat Phani; University of Sydney Sydney Medical School, Northern Clinical School; John Walsh Centre for Rehabilitation Research, Kolling Institute<br>Middleton, James; University of Sydney Sydney Medical School, Northern Clinical School; John Walsh Centre for Rehabilitation Research, Kolling Institute<br>McElduff, Patrick ; Health Policy Analysis Pty Ltd<br>Pearse, Jim; Health Policy Analysis Pty Ltd<br>Walsh, John; University of Sydney Sydney Medical School, Northern Clinical School; John Walsh Centre for Rehabilitation Research, Kolling Institute<br>Cameron, Ian; University of Sydney, Sydney Medical School - Northern; John Walsh Centre for Rehabilitation Research, Kolling Institute<br>Sharwood, Lisa; Kolling Institute; University of Sydney |
| Keywords:                     | traumatic injury, spinal cord injury, health services research, cost-effectiveness analysis, linkage study                                                                                                                                                                                                                                                                                                                                                                                                                                                                                                                                                                                                                                                                                   |
|                               |                                                                                                                                                                                                                                                                                                                                                                                                                                                                                                                                                                                                                                                                                                                                                                                              |

SCHOLARONE™  
Manuscripts

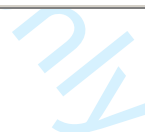

1  
2  
3 **Assessing the impact of care pathways on potentially preventable complications and costs**  
4 **for spinal trauma patients: protocol for a data linkage study using cohort study and**  
5 **administrative data.**  
6  
7  
8  
9

10 Vaikuntam BP<sup>1,2\*</sup>, Middleton JW<sup>1,2,4</sup>, McElduff P<sup>3</sup>, Pearce J<sup>3</sup>, Walsh J<sup>1,2</sup>, Cameron ID<sup>1,2</sup>,  
11  
12 Sharwood LN<sup>1,2</sup>  
13  
14

15  
16 \*corresponding author  
17  
18  
19

20  
21 <sup>1</sup>Sydney Medical School, Northern; University of Sydney, Sydney, Australia  
22

23 <sup>2</sup>John Walsh Centre for Rehabilitation Research; Kolling Institute, Sydney, Australia  
24

25 <sup>3</sup>Health Policy Analysis, Sydney, Australia  
26

27 <sup>4</sup>NSW State-wide Spinal Cord Injury Service; Agency for Clinical Innovation, Sydney, Australia  
28  
29  
30

31 Corresponding author: Vaikuntam Bharat Phani  
32

33  
34 Email: [bvai6198@uni.sydney.edu.au](mailto:bvai6198@uni.sydney.edu.au)  
35

36 Telephone: +61 411820726  
37

38  
39 Postal Address: <sup>2</sup>John Walsh Centre for Rehabilitation Research, Kolling Institute, Royal North  
40 Shore Hospital, Sydney, NSW 2065 Australia  
41  
42

43 Author 2: Middleton James Walter  
44

45  
46 Email: [james.middleton@sydney.edu.au](mailto:james.middleton@sydney.edu.au)  
47

48 Institutional Address: <sup>1</sup>Sydney Medical School, Northern; University of Sydney, Sydney,  
49 Australia.  
50

51  
52 <sup>2</sup>John Walsh Centre for Rehabilitation Research; Kolling Institute, Sydney, Australia.  
53

54 <sup>4</sup>NSW State-wide Spinal Cord Injury Service; Agency for Clinical Innovation, Sydney, Australia  
55  
56  
57

58  
59  
60 1

1  
2  
3 Author 3: McElduff Patrick

4  
5 Email: [pmcelduff@healthpolicy.com.au](mailto:pmcelduff@healthpolicy.com.au)

6  
7  
8 Institutional Address: <sup>3</sup>Health Policy Analysis, Sydney, Australia

9  
10 Author 4: Pearse Jim

11  
12 Email: [JPearse@healthpolicy.com.au](mailto:JPearse@healthpolicy.com.au)

13  
14  
15 Institutional Address: <sup>3</sup>Health Policy Analysis, Sydney, Australia

16  
17 Author 5: Walsh John

18  
19 Email: [magoo.actuarial@gmail.com](mailto:magoo.actuarial@gmail.com)

20  
21  
22 Institutional Address: <sup>1</sup>Sydney Medical School, Northern; University of Sydney, Sydney,  
23  
24 Australia.

25  
26  
27 <sup>2</sup>John Walsh Centre for Rehabilitation Research; Kolling Institute, Sydney, Australia.

28  
29 Author 6: Cameron Ian David

30  
31 Email: [ian.cameron@sydney.edu.au](mailto:ian.cameron@sydney.edu.au)

32  
33  
34 Institutional Address: <sup>1</sup>Sydney Medical School, Northern; University of Sydney, Sydney,  
35  
36 Australia.

37  
38  
39 <sup>2</sup>John Walsh Centre for Rehabilitation Research; Kolling Institute, Sydney, Australia.

40  
41 Author 7: Sharwood Lisa Nicole

42  
43 Email: [lisa.sharwood@sydney.edu.au](mailto:lisa.sharwood@sydney.edu.au)

44  
45  
46 Institutional Address: <sup>1</sup>Sydney Medical School, Northern; University of Sydney, Sydney,  
47  
48 Australia.

49  
50  
51 <sup>2</sup>John Walsh Centre for Rehabilitation Research; Kolling Institute, Sydney, Australia.

52  
53 **Word count:** 3039 (excluding appendices)

1  
2  
3  
4  
5  
6  
7  
8  
9  
10  
11  
12  
13  
14  
15  
16  
17  
18  
19  
20  
21  
22  
23  
24  
25  
26  
27  
28  
29  
30  
31  
32  
33  
34  
35  
36  
37  
38  
39  
40  
41  
42  
43  
44  
45  
46  
47  
48  
49  
50  
51  
52  
53  
54  
55  
56  
57  
58  
59  
60

**Keywords:** traumatic injury, spinal cord injury, health services research, cost-effectiveness analysis, linkage study

For peer review only

## ABSTRACT

**Introduction** Traumatic spinal cord injuries have significant consequences both for the injured individual and the healthcare system, usually resulting in life-long disability. Evidence has shown that timely medical and surgical interventions can lead to better patient outcomes with implicit cost savings. Potentially preventable secondary complications are therefore indicators of the effectiveness of acute care following traumatic injury. The extent to which policy and clinical variation within the healthcare service impact on outcomes and acute care costs for patients with traumatic spinal cord injury (TSCI) in Australia is not well described.

**Methods and Analysis** A comprehensive dataset will be formed using record linkage to combine patient health and administrative records from seven minimum data collections (including costs), with an existing dataset of patients with acute TSCI (Access to Care Study), for the time period June 2013-June 2016. This person-level dataset will be analysed to estimate the acute care treatment costs of traumatic spinal cord injury in New South Wales, extrapolated nationally. Subgroup analyses will describe the associated costs of secondary complications and regression analysis will identify drivers of higher treatment costs. Mapping patient care and health service pathways of these patients will enable measurement of deviations from best-practice care standards and cost-effectiveness analyses of the different pathways.

**Ethics and dissemination** Ethics approval has been obtained from the New South Wales Population and Health Services Research Ethics Committee. Dissemination strategies include peer-reviewed publications in scientific journals and conference presentations to enable translation of study findings to clinical and policy audiences.

## ARTICLE SUMMARY

### Article Focus

- This article reports the protocol of a data linkage study assessing the impact of care pathways on potentially preventable complications and costs for patients with acute TSCI.
- This study will quantify the financial costs of deviation from best practice standards and identify a cost-effective best-practice clinical pathway for patients with TSCI.

### Strengths and limitations

- The effective use of the Centre for Health Record's capacity to link to additional datasets that are not routinely part of the administrative data collections enables a richer subset of data within which to examine the costs and care provided for patients with TSCI in the state of New South Wales, Australia.
- The use of New South Wales Activity Based Funding District and Network Return Data is a novel strategy to capture the true costs of treatment for patients with TSCI in acute care settings at the hospital level.
- The costs are limited to the perspective of the healthcare provider with direct social care costs and indirect costs from loss of productivity to patients or care givers not included, and thereby underestimates the financial impact of TSCI to the society as a whole.

## INTRODUCTION

Traumatic spinal cord injury (TSCI) is a devastating injury, most often being life-altering and causing life-long disability. The ongoing physical, mental and economic consequences of this type of injury have substantial effects on patients and their families. The equally enduring economic responsibilities on the health care service fall similarly on personal health insurance, as well as disability and injury insurance providers. The cost of spinal cord injury in Australia was last estimated at \$2 billion annually in 2008 <sup>1</sup>; consumer price indexation adjusts this to \$2.38 billion in 2017 <sup>2</sup>. The majority (79%) of all new spinal cord injury cases reported to specialist Spinal Cord Injury Units (SCIU) are attributable to trauma and as such, the burden of TSCI on the Australian health care system is high <sup>3</sup>. Improvements in pre-hospital and early trauma care have seen improved survival rates after severe traumatic injury <sup>4</sup>, shifting a greater morbidity burden to life-time injury. As this continues the long-term costs of ongoing disability associated with severe injury will also rise.

The incidence of TSCI in Australia is reported between 15.0 – 32.3 cases per million population per year, with an estimated prevalence of 10,000 - 20,000 Australians living with an SCI <sup>5-7</sup>. Very high treatment costs for patients with TSCI in an acute care setting have been described in the international context <sup>8 9</sup>; however, updated evaluation of treatment costs for patients with TSCI in Australia are needed. It is vital to contextualise these costs in the present day configuration of acute care settings and specialist services. This picture must be completed with exploration and clarification of the drivers of higher treatment costs, and in particular, any measurable association with clinical variation in the care of patients with TSCI. The prevalence



1  
2  
3 and cost of potentially preventable complications for patients with TSCI needs exploration in the  
4 Australian healthcare setting, in order to drive health service improvement nationally.  
5

6  
7 Evidence has shown that failure to provide care according to specific guidelines in a timely  
8 manner for the patient with TSCI, can directly affect both patient outcomes and the costs of  
9 rehabilitation and treatment<sup>10 11</sup>. During the immediate post-injury phase, patients with TSCI are  
10 at high risk of secondary neurological damage related to neural tissue oedema, increased cord  
11 compression, altered blood flow and reduced tissue perfusion, which can lead to permanent  
12 neurological degeneration. Timely medical and surgical interventions can prevent or reduce the  
13 extent of secondary neurological injury and lead to better patient outcomes with implicit cost  
14 savings<sup>12 13</sup>. It is further well described that specific acute care protocols must be followed to  
15 avoid preventable secondary complications such as pressure injuries, urinary tract or respiratory  
16 infections, which may otherwise severely hamper long term recovery and outcomes.  
17  
18  
19  
20  
21  
22  
23  
24  
25  
26  
27  
28  
29  
30  
31  
32

33 Significant variations in policy and practice may exist among health care providers based on  
34 differences in perceptions of precisely what constitutes 'best-practice' specialist care, including  
35 referral patterns to specialist centres and the timing of surgical intervention<sup>14</sup>. However, there is  
36 little evidence on the extent to which variations in clinical practice and institutional performance  
37 in Australia affect patient outcomes and acute care costs, and further, are amenable to change.  
38  
39  
40  
41  
42  
43  
44 This has been identified as a priority by the Australian Institute for Health and Welfare<sup>15</sup>.  
45  
46  
47  
48

49 This study will examine a data linkage cohort of patients 16 years of age or older, who sustained  
50 acute TSCI in the Australian state of New South Wales (NSW) between 01 June 2013 and 03 Jan  
51 2016 with the following primary aims:  
52  
53  
54  
55  
56  
57  
58  
59  
60

- 1  
2  
3 1. To accurately quantify the acute care costs for patients with TSCI across NSW, and explore  
4 health service pathway and clinical practice variations potentially attributable to higher cost  
5 hospitalisations.  
6  
7  
8  
9
- 10 2. To describe the incidence of potentially preventable complications in patients with acute TSCI  
11 and the associated incremental healthcare costs.  
12  
13
- 14 3. To benchmark actual patient pathways and care against the best-practice standards previously  
15 defined using a modified e-Delphi process and other sources, quantifying financial costs  
16 associated with deviation of care from these standards.  
17  
18  
19  
20
- 21 4. To estimate and compare the cost-effectiveness of treatment pathway options, and construct an  
22 efficiency measure for comparison.  
23  
24  
25  
26  
27

28 Understanding the costs and health service drivers associated with potentially preventable  
29 complications should clarify the investment potential in the construction and implementation of a  
30 cost-effective 'best-practice' clinical pathway for patients with TSCI. Communication of these  
31 findings will therefore aim to drive change on a national scale.  
32  
33  
34  
35  
36  
37

## 38 **METHODS AND ANALYSIS**

39  
40  
41 The Access to Care study <sup>7</sup> is a cohort study of 202 patients with TSCI, documenting early care  
42 protocols and transport decisions from the scene of injury to definitive diagnosis and specialised  
43 treatment. Recruitment occurred from June 2013 to January 2016. The NSW Admitted Patient  
44 Data Collection (APDC) will be used to identify and extract TSCI patient records from all  
45 separations from NSW public hospitals, based on specific TSCI related International  
46 Classification of Diseases and Related Health Problems, 10th Version, Australian Modification  
47 (ICD-10 AM) codes (Appendix 1) in their diagnosis codes. Data linkage will be undertaken by  
48  
49  
50  
51  
52  
53  
54  
55  
56  
57

1  
2  
3 the NSW Centre for Health Record Linkage(CHeReL), linking the Access to Care study dataset  
4  
5 with the APDC.  
6  
7

8 The NSW APDC contains demographic and hospitalisation data for every inpatient admission to  
9  
10 any public hospital in NSW. These records will be then linked by the CHeReL, with the  
11  
12 following administrative patient datasets using a combination of deterministic and probabilistic  
13  
14 methods;  
15  
16

- 17  
18 • NSW Emergency Department Data Collection (EDDC) which contains data on  
19  
20 presentations to emergency departments in most public hospitals in NSW;  
21  
22
- 23 • NSW Ambulance data collection which contains information from the Computer Aided  
24  
25 Dispatch (CAD) system and patient health records;  
26  
27
- 28 • NSW Registry of Births, Deaths and Marriages Data which records information for  
29  
30 deaths occurring in NSW; and the NSW Cause of Death files;  
31  
32
- 33 • NSW Activity Based Funding District and Network Return (NSW-DNR) Data Collection  
34  
35 on individual patient cost and health service activity data to ensure all cases were  
36  
37 included prior to case identification.  
38  
39

40 The CHeReL uses probabilistic record linkage techniques to link the patient identifiers from the  
41  
42 APDC to the other datasets using a best practice protocol for preserving the patient privacy.  
43  
44 Linked patient health care records will include pre-hospital and acute care administrative data  
45  
46 collections and death records, as well as cost data collections to provide a comprehensive  
47  
48 dataset. The final record linked dataset will be analysed to identify the first hospital admission  
49  
50 for a patient satisfying the criteria for a TSCI (hereafter called the index admission), providing  
51  
52 details of comorbidities, inpatient complications and unplanned readmissions within the study  
53  
54  
55  
56  
57

1  
2  
3 period to address the study objectives. The index admission will be considered the first to have  
4 one of the identified ICD-10-AM codes for TSCI in an acute separation (see Appendix 1); such  
5 admissions will most likely have an immediately preceding NSW Ambulance retrieval and  
6 transfer record.  
7  
8  
9  
10

## 11 **Analysis Plan**

12 The study aims are expanded in the following paragraphs.

13  
14  
15  
16  
17  
18 *1. To accurately quantify the acute care costs for patients with TSCI across NSW, and explore*  
19  
20 *health service pathway and clinical practice variations potentially attributable to higher cost*  
21 *hospitalisations.*  
22  
23  
24

25 Data on resource use will be collected using the NSW-DNR data and Australian Refined  
26 Diagnostic Related Group (AR-DRG) codes recorded in the APDC and EDDC for each episode  
27 of care for patients with TSCI. Sub-categorisations within the NSW-DNR include employee  
28 related costs, costs of visiting medical officers, other operating expenses, professional indemnity  
29 charges, hospital finance costs, depreciation and amortisation, payments to affiliated health  
30 organisations and grant and subsidy costs.  
31  
32  
33  
34  
35  
36  
37  
38  
39

40 A Generalized Linear Model (GLM) regression with a log link and gamma error term will be  
41 performed on the costs to determine independent predictors of acute care costs. Variables for the  
42 severity of the injury such as the ICD 10<sup>th</sup> revision-based Injury Severity Scores (ICISS),  
43 Charlson Co-morbidity Index and the level of injury (cervical, thoracic or lumbar regions) will  
44 be included in the model to adjust for the heterogeneity between the patients. Sensitivity  
45 analysis will be used to account for the excess costs incurred by co-morbidities not attributable to  
46 TSCI; decreasing costs by percentage figure relative to the presence of co-morbidities at the time  
47  
48  
49  
50  
51  
52  
53  
54  
55  
56  
57

1  
2  
3 of the TSCI. Variation in activity-based costs will be explored to highlight areas of resource use  
4 that require further investigation, similar to research conducted recently across the NSW Trauma  
5 Service, using this approach <sup>16</sup>.  
6  
7

8  
9  
10 2. *To describe the incidence of potentially preventable complications in patients with acute TSCI*  
11 *and the associated incremental healthcare costs.*  
12  
13

14 Potentially preventable complications (such as pressure ulcers or urinary tract infections) related  
15 to the TSCI and within the index admission will be identified within the ICD-10-AM codes, pre-  
16 defined according to published data <sup>17</sup> and listed in Appendix 2. Subsequent re-admissions from  
17 the index admission and within the study period will be scrutinised to determine any ongoing  
18 injury sequelae including potentially preventable complications. Readmissions within 30 days  
19 from first acute discharge will be principally identified as unplanned readmissions. The cost of  
20 these secondary complications will be estimated using the NSW DNR data and AR-DRG codes  
21 recorded for each episode of care.  
22  
23  
24  
25  
26  
27  
28  
29  
30  
31

32  
33 3. To benchmark actual patient pathways and care against the best-practice standards previously  
34 defined through a modified e-Delphi process and other sources, quantifying financial costs  
35 associated with deviation of care from these standards.  
36  
37  
38  
39

40 The patient clinical care pathway will be mapped from the scene of injury to definitive care,  
41 incorporating numbers of hospital transfers, hospital specific factors describing healthcare  
42 utilisation, length of stay, hospital level and their location. This mapping will be compared with  
43 the best-practice care standards defined by the modified e-Delphi process <sup>18</sup> and current state  
44 based guidelines for the management of major trauma, to determine the clinical pathway  
45 components reflecting optimal timing and care. This comparison will permit factors potentially  
46 associated with unwarranted clinical variation for patients with TSCI to be identified.  
47  
48  
49  
50  
51  
52  
53  
54  
55  
56  
57

1  
2  
3 A gap driver analysis will aim to identify drivers of cost and clinical pathway differences and  
4 will consider factors including delayed and/or multiple transfers, delays in timing of surgery,  
5  
6 lack of admission to specialist TSCI services and the occurrence of secondary complications. A  
7  
8 range of controllable and uncontrollable factors will be measured against the best practice  
9  
10 standards. Multilevel regression analysis will be performed to determine patient-level, and  
11  
12 hospital-level factors associated with cost variability.  
13  
14  
15

16  
17 4. *To estimate and compare the cost-effectiveness of treatment pathway options, and propose a*  
18  
19 *cost-effective clinical pathway*  
20

21 Decision-analytic modelling will be used to build a cost-effective clinical pathway closely  
22 emulating the best-practice standards. A decision tree will be modelled based on the observed  
23 hospital costs, admissions, readmissions, mortality and complications data from the linked health  
24 records, Australian life tables, previously mapped care pathways, incidence rates and previously  
25 published literature. Total resource use calculated will include the costs for admissions,  
26 complications, emergency department visits, surgery, readmissions and diagnostic services, and  
27 will be estimated for the analysis and presented in Australian dollars. Relevant internal validity  
28 measures will be undertaken to affirm the validity of the model<sup>19</sup>. A cost-effectiveness analysis  
29 will be conducted to compare the proposed/modelled care pathway against the current care  
30 practices identified in the record linked data, from the perspective of the healthcare provider. The  
31 model will utilize the study population and the study settings described above over a period of 12  
32 months post-injury for the evaluation. Service utilisation data attached to each unique health  
33 record will be extracted and analysed based on the relevance of AR-DRG codes to the ICD-10  
34 codes of interest. Cost weights associated with each AR-DRG will be adjusted for differences for  
35 each financial year during the entire study period. All cost data will be inflated or deflated as  
36  
37  
38  
39  
40  
41  
42  
43  
44  
45  
46  
47  
48  
49  
50  
51  
52  
53  
54  
55  
56  
57

1  
2  
3 required using the published health deflators and a discount rate of 5% will be used in the  
4  
5 evaluation. The Quality Adjusted Life Years (QALYs) for each treatment arm for the modelling  
6  
7 will be derived from follow up interview self-reports from the patients in the nested Access to  
8  
9 Care study, combined with estimates from similarly published literature.

10  
11  
12 These utility measures will be subject to probabilistic sensitivity analysis along with other key  
13  
14 parameters in the model over a wide range based on clinical judgement and existing literature.

15  
16  
17 The incremental cost effectiveness ratios (ICERs) will be estimated to compare the interventions  
18  
19 using the expected costs and effects from the decision analytic modelling exercise. A cost-  
20  
21 effectiveness (CE) plane will be used to plot the ICER and the uncertainty will be represented by  
22  
23 confidence ellipses, which are a two dimensional representation of the confidence intervals<sup>20</sup>.

24  
25  
26 All the data analyses will be conducted using Stata software (version 15.0 STATA Corporation,  
27  
28 College Station, TX, USA) and the decision analytic modelling will be conducted using the  
29  
30 Treeage Pro software (2017 Version R2).

### 31 32 33 **Patient and public involvement**

34  
35 The study will use de-identified record linked health data and will not involve any patients or  
36  
37 public for this study.

### 38 39 40 41 **ETHICS AND DISSEMINATION**

42  
43  
44 Ethics approval has been obtained from the NSW Population and Health Services Research  
45  
46 Ethics Committee. The Access to Care study database contains 202 patients who have consented  
47  
48 to access to their medical records, this dataset was identified for the purpose of record linkage  
49  
50 and returned de-identified. Dissemination of research findings to key stakeholders is envisaged  
51  
52 through peer reviewed publications in scientific journals, conference proceedings and  
53  
54

1  
2  
3 collaborator meetings. The study is ideally placed to establish standards, reduce costs with  
4  
5 potential for research translation across the state of NSW.  
6  
7

## 8 9 **DISCUSSION**

10  
11 The long-term impact of TSCI on our health care system is significant and ongoing. Deficits in  
12  
13 clinical policy and practice can significantly impact the extent of long term disability and  
14  
15 resultant quality of life for patients with TSCI, thereby escalating personal and health care  
16  
17 system economic costs. Identification of specific deficits in system performance will facilitate  
18  
19 application of targeted improvement strategies, aiming for greater efficiency of our services,  
20  
21 focused resource use, highest standard of practice and consequently optimal outcomes. This  
22  
23 study is ideally placed to establish standards, reduce costs and translate evidence back to the  
24  
25 bedside.  
26  
27

28  
29 A particular challenge envisaged in this study is the mapping of patient pathways, which may  
30  
31 reveal many routes with multiple interactions within the healthcare system. Many individual  
32  
33 routes can be defined based on the initial diagnosis, geographical location and the transition  
34  
35 pathway. However, to be useful for the analysis, these pathways will need to be aggregated into a  
36  
37 manageable number of broader pathways guided primarily by existing policy directives to pre-  
38  
39 hospital and acute care services. Particular limitations are envisaged with the study design;  
40  
41 firstly, the costs are limited to the acute care episode, and direct social care costs or indirect costs  
42  
43 from loss of productivity to patients or caregivers are not included. This therefore underestimates  
44  
45 the financial impact of TSCI to society as a whole. Despite all the efforts to accurately describe  
46  
47 all cost elements of acute care, the possibility of some resources not being captured cannot be  
48  
49 excluded. However, we anticipate this aspect at least to be uniform across all subgroups or  
50  
51  
52  
53  
54  
55  
56  
57  
58  
59  
60



1  
2  
3 pathways and not significantly affect the research findings as most of the resources will be  
4  
5 accounted for in the costing exercise.  
6  
7  
8  
9

10 This study proposes to describe the costs of acute care, including those identified as attributable  
11 to potentially preventable complications. Care pathway deviations from best practice will be  
12 described, such as delayed surgery or delayed admission to SCIU for patients with TSCI.  
13  
14 Importantly, we aim to quantify the degree to which variation in clinical practice and  
15 institutional performance impacts on patient outcomes and acute care costs and is amenable to  
16 change. These findings are likely to have significant clinical consequences for the patient, cost  
17 implications for the health service<sup>21</sup> and offers significant potential to make amenable  
18 recommendations for improvement.  
19  
20  
21  
22  
23  
24  
25  
26  
27  
28

### 29 **List of abbreviations**

30  
31 APDC - NSW admitted patient data collection  
32  
33

34 AR-DRG - Australian refined diagnostic related group  
35  
36

37 EDDC - NSW emergency department data collection  
38  
39

40 ICD-10-AM - International classification of diseases – tenth revision, Australian modification  
41  
42

43 ICER - Incremental cost effectiveness ratio  
44  
45

46 NSW - New South Wales  
47  
48

49 QALY – Quality adjusted life years  
50  
51

52 SCI - Spinal cord injury  
53  
54

55 SCIU – Spinal cord injury unit  
56  
57

58 15  
59  
60

## TSCI - Traumatic spinal cord injury

## REFERENCES

1. Access Economics. The economic cost of spinal cord injury and traumatic brain injury in Australia. Access Economics for the Victorian Neurotrauma Initiative. Canberra, 2009.
2. Australian Bureau of Statistics. Consumer Price Index. Canberra: [www.abs.gov.au](http://www.abs.gov.au), 2017.
3. Norton L. Spinal Cord Injury, Australia, 2007-08: Australian Institute of Health and Welfare Canberra, 2010.
4. Minei J, Fabian T, Guffey M, et al. Increased Trauma Center Volume Is Associated With Improved Survival After Severe Injury: Results of a Resuscitation Outcomes Consortium Study. *Annals of Surgery* 2014;260(3):456-65.
5. New PW, Baxter D, Farry A, et al. Estimating the Incidence and Prevalence of Traumatic Spinal Cord Injury in Australia. *Archives of Physical Medicine and Rehabilitation* 2015;96(1):76-83. doi: <https://doi.org/10.1016/j.apmr.2014.08.013>
6. Spinal Cord Injuries Australia. SCI Statistics NSW: SCIA; 2017 [Available from: <https://scia.org.au/health-and-sci-facts/sci-statistics> accessed 05/10/2017 2017.
7. Middleton JM, Sharwood LN, Cameron P, et al. Right care, right time, right place: improving outcomes for people with spinal cord injury through early access to intervention and improved access to specialised care: study protocol. *BMC health services research* 2014;14(1):600.
8. Munce SE, Wodchis W, Guilcher SJ, et al. Direct costs of adult traumatic spinal cord injury in Ontario. *Spinal Cord* 2013;51(1):64.
9. DeVivo MJ. Causes and costs of spinal cord injury in the United States. *Spinal Cord* 1997;35(12):809-13.
10. Middleton P, Davies S, Anand S, et al. The pre-hospital epidemiology and management of spinal cord injuries in New South Wales: 2004–2008. *Injury* 2012;43(4):480-85.
11. Mac-Thiong J-M, Feldman DE, Thompson C, et al. Does timing of surgery affect hospitalization costs and length of stay for acute care following a traumatic spinal cord injury? *Journal of neurotrauma* 2012;29(18):2816-22.
12. Rackauskas Z, Lapteva O, Rocka S. Timing of Surgery for Neurologically Compromised Traumatic Cervical Spine Injuries. *Journal of Neurological Surgery Part A: Central European Neurosurgery* 2016;77(05):427-31.
13. Fehlings MG, Vaccaro A, Wilson JR, et al. Early versus delayed decompression for traumatic cervical spinal cord injury: results of the Surgical Timing in Acute Spinal Cord Injury Study (STASCIS). *PLoS one* 2012;7(2):e32037.
14. Graves N, Zheng H. Modelling the direct health care costs of chronic wounds in Australia. *Wound Practice & Research: Journal of the Australian Wound Management Association* 2014;22(1):20.
15. Australian Government. AIHW, ed. Biennial health report of the Australian Institute of Health and Welfare. Australia's Health 2014. Canberra, 2014.
16. Curtis K, Lam M, Mitchell R, et al. Major trauma: the unseen financial burden to trauma centres, a descriptive multicentre analysis. *Australian Health Review* 2014;38(1):30-37.
17. Middleton J, Lim K, Taylor L, et al. Patterns of morbidity and rehospitalisation following spinal cord injury. *Spinal Cord* 2004;42:359-67.
18. Sharwood L, Stanford R, Middleton J, et al. Improving care standards for patients with spinal trauma combining a modified e-Delphi process and stakeholder interviews: a study protocol. *BMJ Open* 2017:e012377. doi: [doi:10.1136/bmjopen-2016-012377](https://doi.org/10.1136/bmjopen-2016-012377)

- 1  
2  
3 19. McCabe C, Dixon S. Testing the validity of cost-effectiveness models. *Pharmacoeconomics*  
4 2000;17(5):501-13.  
5 20. Petrou S, Gray A. Economic evaluation alongside randomised controlled trials: design, conduct,  
6 analysis, and reporting. *Bmj* 2011;342:d1548.  
7 21. Grimshaw JM, Eccles MP, Lavis JN, et al. Knowledge translation of research findings. *Implementation*  
8 *science* 2012;7(1):50.  
9  
10  
11  
12

## 13 **DECLARATIONS**

14  
15 Ethics: Ethics approval for this study has been grant NSW Population & Health Services  
16 Research Ethics Committee on 17 August 2016 (AU RED REF: HREC/16/CIPHS/19).  
17

18  
19 Availability of data and materials: The data used in this protocol cannot be shared with any other  
20 researchers unless approved by the relevant data custodians at the Centre for Health Record  
21 Linkage.  
22  
23  
24

25  
26 Contributorship statement: LNS is the principal investigator for this funded study and was  
27 principally responsible for the conception and design of this study and the acquisition of the  
28 record linkage data. JWM and JW provided substantial intellectual content during the study  
29 design. JWM is the principal investigator for the Access to Care study. LNS is the principal  
30 investigator for the Delphi process project. BPV wrote the first draft of the manuscript and co-  
31 coordinated commentary and review for subsequent revisions. All authors contributed to the critical  
32 review and approval of the final manuscript.  
33  
34  
35  
36  
37  
38  
39  
40  
41  
42

43 Funding: This project is funded by grants from the Ramsay Research & Teaching Fund and  
44 icare™. LNS is funded by icare™ and the John Walsh Centre for Rehabilitation Research.  
45  
46  
47

48 Acknowledgements: This study forms part of a research higher degree project of the primary  
49 author, supported by icare™ and The University of Sydney. We would also like to acknowledge  
50 the contributions of Professor Luke Connelly to the review of this manuscript.  
51  
52  
53  
54  
55  
56  
57

1  
2  
3 Competing interests: The authors declare that they have no competing interests.  
4  
5  
6  
7  
8  
9  
10  
11  
12  
13  
14  
15  
16  
17  
18  
19  
20  
21  
22  
23  
24  
25  
26  
27  
28  
29  
30  
31  
32  
33  
34  
35  
36  
37  
38  
39  
40  
41  
42  
43  
44  
45  
46  
47  
48  
49  
50  
51  
52  
53  
54  
55  
56  
57  
58  
59  
60

For peer review only

## APPENDIX 1

The dataset combined all patients for whom one of the following ICD-10-AM (International Classification of Diseases – Tenth Revision, Australian Modification) codes have been identified in any separation, and in any position of the diagnostic code list within the NSW Admitted Patient Data Collection (APDC):

S12, S12.0, S12.1, S12.2, S12.21, S12.22, S12.23, S12.24, S12.25, S12.7, S12.8, S12.9, S13.1, S13.10, S13.11, S13.12, S13.13, S13.14, S13.15, S13.16, S13.17, S13.18, S13.2, S13.3, S14.0, S14.10, S14.11, S14.12, S14.13, S14.70, S14.71, S14.72, S14.73, S14.74, S14.75, S14.76, S14.77, S14.78, S22.0, S22.00, S22.01, S22.02, S22.03, S22.04, S22.05, S22.06, S22.1, S24.0, S24.1, S24.10, S24.11, S24.12, S24.7, S24.70, S24.71, S24.72, S24.73, S24.74, S24.75, S24.76, S24.77, S32, S32.0, S32.00, S32.01, S32.02, S32.03, S32.04, S32.05, S34.0, S34.1, S34.3, S34.70, S34.71, S34.72, S34.73, S34.74, S34.75, S34.76, T06.0, T06.1, T09.3.

## APPENDIX 2

### List of complications and ICD 10 codes

| Complication                          | ICD 10 codes                   |
|---------------------------------------|--------------------------------|
| Urinary tract infection               | N30, N39                       |
| Hydronephrosis, hydro-ureter          | N13                            |
| Other disorders of bladder            | N31                            |
| Urethritis                            | N34, N37                       |
| Haematuria                            | R31                            |
| Other urinary complication            | N99.8, N99.9                   |
| Decubitus ulcers (pressure ulcer)     | L89                            |
| Pneumonitis due to solids and liquids | J69                            |
| Tracheostomy complication             | J95.0                          |
| Urinary retention/incontinence        | R33, R32, N39.4, N39.3         |
| Pneumonia, pulmonary collapse         | J12, J14, J15, J17, J18, J98.1 |
| Pleurisy                              | R09.1, J86.9, J86.0, J90       |
| Respiratory failure                   | J96.9, J96.0, J96.1            |

# BMJ Open

## Assessing the impact of care pathways on potentially preventable complications and costs for spinal trauma patients: protocol for a data linkage study using cohort study and administrative data.

|                                 |                                                                                                                                                                                                                                                                                                                                                                                                                                                                                                                                                                                                                                                                                                                                                                                              |
|---------------------------------|----------------------------------------------------------------------------------------------------------------------------------------------------------------------------------------------------------------------------------------------------------------------------------------------------------------------------------------------------------------------------------------------------------------------------------------------------------------------------------------------------------------------------------------------------------------------------------------------------------------------------------------------------------------------------------------------------------------------------------------------------------------------------------------------|
| Journal:                        | <i>BMJ Open</i>                                                                                                                                                                                                                                                                                                                                                                                                                                                                                                                                                                                                                                                                                                                                                                              |
| Manuscript ID                   | bmjopen-2018-023785.R1                                                                                                                                                                                                                                                                                                                                                                                                                                                                                                                                                                                                                                                                                                                                                                       |
| Article Type:                   | Protocol                                                                                                                                                                                                                                                                                                                                                                                                                                                                                                                                                                                                                                                                                                                                                                                     |
| Date Submitted by the Author:   | 12-Sep-2018                                                                                                                                                                                                                                                                                                                                                                                                                                                                                                                                                                                                                                                                                                                                                                                  |
| Complete List of Authors:       | Vaikuntam, Bharat Phani; University of Sydney Sydney Medical School, Northern Clinical School; John Walsh Centre for Rehabilitation Research, Kolling Institute<br>Middleton, James; University of Sydney Sydney Medical School, Northern Clinical School; John Walsh Centre for Rehabilitation Research, Kolling Institute<br>McElduff, Patrick ; Health Policy Analysis Pty Ltd<br>Pearse, Jim; Health Policy Analysis Pty Ltd<br>Walsh, John; University of Sydney Sydney Medical School, Northern Clinical School; John Walsh Centre for Rehabilitation Research, Kolling Institute<br>Cameron, Ian; University of Sydney, Sydney Medical School - Northern; John Walsh Centre for Rehabilitation Research, Kolling Institute<br>Sharwood, Lisa; Kolling Institute; University of Sydney |
| <b>Primary Subject Heading</b>: | Health services research                                                                                                                                                                                                                                                                                                                                                                                                                                                                                                                                                                                                                                                                                                                                                                     |
| Secondary Subject Heading:      | Health economics                                                                                                                                                                                                                                                                                                                                                                                                                                                                                                                                                                                                                                                                                                                                                                             |
| Keywords:                       | traumatic injury, spinal cord injury, health services research, cost-effectiveness analysis, linkage study                                                                                                                                                                                                                                                                                                                                                                                                                                                                                                                                                                                                                                                                                   |
|                                 |                                                                                                                                                                                                                                                                                                                                                                                                                                                                                                                                                                                                                                                                                                                                                                                              |

SCHOLARONE™  
Manuscripts

1  
2  
3 **Assessing the impact of care pathways on potentially preventable complications and costs**  
4 **for spinal trauma patients: protocol for a data linkage study using cohort study and**  
5 **administrative data.**  
6  
7  
8

9  
10 Vaikuntam BP<sup>1,2\*</sup>, Middleton JW<sup>1,2,4</sup>, McElduff P<sup>3</sup>, Pearse J<sup>3</sup>, Walsh J<sup>1,2</sup>, Cameron ID<sup>1,2</sup>,  
11  
12 Sharwood LN<sup>1,2</sup>  
13

14  
15  
16 \*corresponding author  
17

18  
19  
20 <sup>1</sup>Sydney Medical School, Northern; University of Sydney, Sydney, Australia  
21

22  
23 <sup>2</sup>John Walsh Centre for Rehabilitation Research; Kolling Institute, Sydney, Australia  
24

25  
26 <sup>3</sup>Health Policy Analysis, Sydney, Australia  
27

28  
29 <sup>4</sup>NSW State-wide Spinal Cord Injury Service; Agency for Clinical Innovation, Sydney, Australia  
30

31  
32 Corresponding author: Vaikuntam Bharat Phani  
33

34  
35 Email: [bvai6198@uni.sydney.edu.au](mailto:bvai6198@uni.sydney.edu.au)  
36

37  
38 Telephone: +61 411820726  
39

40  
41 Postal Address: <sup>2</sup>John Walsh Centre for Rehabilitation Research, Kolling Institute, Royal North  
42 Shore Hospital, Sydney, NSW 2065 Australia  
43

44  
45 Author 2: Middleton James Walter  
46

47  
48 Email: [james.middleton@sydney.edu.au](mailto:james.middleton@sydney.edu.au)  
49

50  
51 Institutional Address: <sup>1</sup>Sydney Medical School, Northern; University of Sydney, Sydney,  
52 Australia.  
53

54  
55 <sup>2</sup>John Walsh Centre for Rehabilitation Research; Kolling Institute, Sydney, Australia.  
56

57  
58 <sup>4</sup>NSW State-wide Spinal Cord Injury Service; Agency for Clinical Innovation, Sydney, Australia  
59

60  
1

1  
2  
3 Author 3: McElduff Patrick  
4

5 Email: [pmcelduff@healthpolicy.com.au](mailto:pmcelduff@healthpolicy.com.au)  
6

7  
8 Institutional Address: <sup>3</sup>Health Policy Analysis, Sydney, Australia  
9

10 Author 4: Pearse Jim  
11

12 Email: [JPearse@healthpolicy.com.au](mailto:JPearse@healthpolicy.com.au)  
13

14  
15 Institutional Address: <sup>3</sup>Health Policy Analysis, Sydney, Australia  
16

17 Author 5: Walsh John  
18

19 Email: [magoo.actuarial@gmail.com](mailto:magoo.actuarial@gmail.com)  
20

21  
22 Institutional Address: <sup>1</sup>Sydney Medical School, Northern; University of Sydney, Sydney,  
23 Australia.  
24

25  
26 <sup>2</sup>John Walsh Centre for Rehabilitation Research; Kolling Institute, Sydney, Australia.  
27

28  
29 Author 6: Cameron Ian Douglas  
30

31 Email: [ian.cameron@sydney.edu.au](mailto:ian.cameron@sydney.edu.au)  
32

33  
34 Institutional Address: <sup>1</sup>Sydney Medical School, Northern; University of Sydney, Sydney,  
35 Australia.  
36

37  
38 <sup>2</sup>John Walsh Centre for Rehabilitation Research; Kolling Institute, Sydney, Australia.  
39

40  
41 Author 7: Sharwood Lisa Nicole  
42

43 Email: [lisa.sharwood@sydney.edu.au](mailto:lisa.sharwood@sydney.edu.au)  
44

45  
46 Institutional Address: <sup>1</sup>Sydney Medical School, Northern; University of Sydney, Sydney,  
47 Australia.  
48

49  
50 <sup>2</sup>John Walsh Centre for Rehabilitation Research; Kolling Institute, Sydney, Australia.  
51

52 **Word count:** 3039 (excluding appendices)  
53  
54  
55  
56  
57



1  
2  
3  
4  
5  
6  
7  
8  
9  
10  
11  
12  
13  
14  
15  
16  
17  
18  
19  
20  
21  
22  
23  
24  
25  
26  
27  
28  
29  
30  
31  
32  
33  
34  
35  
36  
37  
38  
39  
40  
41  
42  
43  
44  
45  
46  
47  
48  
49  
50  
51  
52  
53  
54  
55  
56  
57  
58  
59  
60

**Keywords:** traumatic injury, spinal cord injury, health services research, cost-effectiveness analysis, linkage study

For peer review only

## ABSTRACT

**Introduction** Traumatic spinal cord injuries have significant consequences both for the injured individual and the healthcare system, usually resulting in life-long disability. Evidence has shown that timely medical and surgical interventions can lead to better patient outcomes with implicit cost savings. Potentially preventable secondary complications are therefore indicators of the effectiveness of acute care following traumatic injury. The extent to which policy and clinical variation within the healthcare service impact on outcomes and acute care costs for patients with traumatic spinal cord injury (TSCI) in Australia is not well described.

**Methods and Analysis** A comprehensive dataset will be formed using record linkage to combine patient health and administrative records from seven minimum data collections (including costs), with an existing dataset of patients with acute TSCI (Access to Care Study), for the time period June 2013-June 2016. This person-level dataset will be analysed to estimate the acute care treatment costs of traumatic spinal cord injury in New South Wales, extrapolated nationally. Subgroup analyses will describe the associated costs of secondary complications and regression analysis will identify drivers of higher treatment costs. Mapping patient care and health service pathways of these patients will enable measurement of deviations from best-practice care standards and cost-effectiveness analyses of the different pathways.

**Ethics and dissemination** Ethics approval has been obtained from the New South Wales Population and Health Services Research Ethics Committee. Dissemination strategies include peer-reviewed publications in scientific journals and conference presentations to enable translation of study findings to clinical and policy audiences.

## ARTICLE SUMMARY

### Article Focus

- This article reports the protocol of a data linkage study assessing the impact of care pathways on potentially preventable complications and costs for patients with acute TSCI.
- This study will quantify the financial costs of deviation from best practice standards and identify a cost-effective best-practice clinical pathway for patients with TSCI.

### Strengths and limitations

- The effective use of the Centre for Health Record's capacity to link to additional datasets that are not routinely part of the administrative data collections enables a richer subset of data within which to examine the costs and care provided for patients with TSCI in the state of New South Wales, Australia.
- The use of New South Wales Activity Based Funding District and Network Return Data is a novel strategy to capture the true costs of treatment for patients with TSCI in acute care settings at the hospital level.
- The costs are limited to the perspective of the healthcare provider with direct social care costs and indirect costs from loss of productivity to patients or care givers not included, and thereby underestimates the financial impact of TSCI to the society as a whole.

## INTRODUCTION

Traumatic spinal cord injury (TSCI) is a devastating injury, most often being life-altering and causing life-long disability. The ongoing physical, mental and economic consequences of this type of injury have substantial effects on patients and their families. The equally enduring economic responsibilities on the health care service fall similarly on personal health insurance, as well as disability and injury insurance providers. The cost of spinal cord injury in Australia was last estimated at \$2 billion annually in 2008 <sup>1</sup>; consumer price indexation adjusts this to \$2.38 billion in 2017 <sup>2</sup>. The majority (79%) of all new spinal cord injury cases reported to specialist Spinal Cord Injury Units (SCIU) are attributable to trauma and as such, the burden of TSCI on the Australian health care system is high <sup>3</sup>. Improvements in pre-hospital and early trauma care have seen improved survival rates after severe traumatic injury <sup>4</sup>, shifting a greater morbidity burden to life-time injury. As this continues the long-term costs of ongoing disability associated with severe injury will also rise.

The incidence of TSCI in Australia is reported between 15.0 – 32.3 cases per million population per year, with an estimated prevalence of 10,000 - 20,000 Australians living with an SCI <sup>5-7</sup>. Very high treatment costs for patients with TSCI in an acute care setting have been described in the international context <sup>8 9</sup>; however, updated evaluation of treatment costs for patients with TSCI in Australia are needed. It is vital to contextualise these costs in the present day configuration of acute care settings and specialist services. This picture must be completed with exploration and clarification of the drivers of higher treatment costs, and in particular, any measurable association with clinical variation in the care of patients with TSCI. The prevalence

1  
2  
3 and cost of potentially preventable complications for patients with TSCI needs exploration in the  
4 Australian healthcare setting, in order to drive health service improvement nationally.  
5

6  
7 Evidence has shown that failure to provide care according to specific guidelines in a timely  
8 manner for the patient with TSCI, can directly affect both patient outcomes and the costs of  
9 rehabilitation and treatment<sup>10 11</sup>. During the immediate post-injury phase, patients with TSCI are  
10 at high risk of secondary neurological damage related to neural tissue oedema, increased cord  
11 compression, altered blood flow and reduced tissue perfusion, which can lead to permanent  
12 neurological degeneration. Timely medical and surgical interventions can prevent or reduce the  
13 extent of secondary neurological injury and lead to better patient outcomes with implicit cost  
14 savings<sup>12 13</sup>. It is further well described that specific acute care protocols must be followed to  
15 avoid preventable secondary complications such as pressure injuries, urinary tract or respiratory  
16 infections, which may otherwise severely hamper long term recovery and outcomes.  
17  
18  
19  
20  
21  
22  
23  
24  
25  
26  
27  
28  
29  
30  
31  
32

33 Significant variations in policy and practice may exist among health care providers based on  
34 differences in perceptions of precisely what constitutes 'best-practice' specialist care, including  
35 referral patterns to specialist centres and the timing of surgical intervention<sup>14</sup>. However, there is  
36 little evidence on the extent to which variations in clinical practice and institutional performance  
37 in Australia affect patient outcomes and acute care costs, and further, are amenable to change.  
38 This has been identified as a priority by the Australian Institute for Health and Welfare<sup>15</sup>.  
39  
40  
41  
42  
43  
44  
45  
46  
47  
48

49 This study will examine a data linkage cohort of patients 16 years of age or older, who sustained  
50 acute TSCI in the Australian state of New South Wales (NSW) between 01 June 2013 and 03 Jan  
51 2016 with the following primary aims:  
52  
53  
54  
55  
56  
57

- 1  
2  
3 1. To accurately quantify the acute care costs for patients with TSCI across NSW, and explore  
4 health service pathway and clinical practice variations potentially attributable to higher cost  
5 hospitalisations.  
6  
7  
8  
9
- 10 2. To describe the incidence of potentially preventable complications in patients with acute TSCI  
11 and the associated incremental healthcare costs.  
12  
13
- 14 3. To benchmark actual patient pathways and care against the best-practice standards previously  
15 defined using a modified e-Delphi process and other sources, quantifying financial costs  
16 associated with deviation of care from these standards.  
17  
18  
19  
20
- 21 4. To estimate and compare the cost-effectiveness of treatment pathway options, and construct an  
22 efficiency measure for comparison.  
23  
24  
25  
26  
27

28 Understanding the costs and health service drivers associated with potentially preventable  
29 complications should clarify the investment potential in the construction and implementation of a  
30 cost-effective 'best-practice' clinical pathway for patients with TSCI. Communication of these  
31 findings will therefore aim to drive change on a national scale.  
32  
33  
34  
35  
36  
37

## 38 **METHODS AND ANALYSIS**

39  
40  
41 The Access to Care study <sup>7</sup> is a cohort study of 202 patients with TSCI, documenting early care  
42 protocols and transport decisions from the scene of injury to definitive diagnosis and specialised  
43 treatment. Recruitment occurred from June 2013 to January 2016. The NSW Admitted Patient  
44 Data Collection (APDC) will be used to identify and extract TSCI patient records from all  
45 separations from NSW public hospitals, based on specific TSCI related International  
46 Classification of Diseases and Related Health Problems, 10th Version, Australian Modification  
47 (ICD-10 AM) codes (Appendix 1) in their diagnosis codes. Data linkage will be undertaken by  
48  
49  
50  
51  
52  
53  
54  
55  
56  
57

1  
2  
3 the NSW Centre for Health Record Linkage(CHeReL), linking the Access to Care study dataset  
4  
5 with the APDC.  
6  
7

8 The NSW APDC contains demographic and hospitalisation data for every inpatient admission to  
9  
10 any public hospital in NSW. These records will be then linked by the CHeReL, with the  
11  
12 following administrative patient datasets using a combination of deterministic and probabilistic  
13  
14 methods;  
15  
16

- 17  
18 • NSW Emergency Department Data Collection (EDDC) which contains data on  
19  
20 presentations to emergency departments in most public hospitals in NSW;  
21  
22
- 23 • NSW Ambulance data collection which contains information from the Computer Aided  
24  
25 Dispatch (CAD) system and patient health records;  
26  
27
- 28 • NSW Registry of Births, Deaths and Marriages Data which records information for  
29  
30 deaths occurring in NSW; and the NSW Cause of Death files;  
31  
32
- 33 • NSW Activity Based Funding District and Network Return (NSW-DNR) Data Collection  
34  
35 on individual patient cost and health service activity data to ensure all cases were  
36  
37 included prior to case identification.  
38  
39

40 The CHeReL uses probabilistic record linkage techniques to link the patient identifiers from the  
41  
42 APDC to the other datasets using a best practice protocol for preserving the patient privacy.  
43  
44 Linked patient health care records will include pre-hospital and acute care administrative data  
45  
46 collections and death records, as well as cost data collections to provide a comprehensive  
47  
48 dataset. The final record linked dataset will be analysed to identify the first hospital admission  
49  
50 for a patient satisfying the criteria for a TSCI (hereafter called the index admission), providing  
51  
52 details of comorbidities, inpatient complications and unplanned readmissions within the study  
53  
54  
55  
56  
57

1  
2  
3 period to address the study objectives. The index admission will be considered the first to have  
4 one of the identified ICD-10-AM codes for TSCI in an acute separation (see Appendix 1); such  
5 admissions will most likely have an immediately preceding NSW Ambulance retrieval and  
6 transfer record.  
7  
8  
9  
10

## 11 **Analysis Plan**

12 The study aims are expanded in the following paragraphs.

13  
14  
15  
16  
17  
18 *1. To accurately quantify the acute care costs for patients with TSCI across NSW, and explore*  
19  
20 *health service pathway and clinical practice variations potentially attributable to higher cost*  
21 *hospitalisations.*  
22  
23  
24

25 Data on resource use will be collected using the NSW-DNR data and Australian Refined  
26 Diagnostic Related Group (AR-DRG) codes recorded in the APDC and EDDC for each episode  
27 of care for patients with TSCI. Sub-categorisations within the NSW-DNR include employee  
28 related costs, costs of visiting medical officers, other operating expenses, professional indemnity  
29 charges, hospital finance costs, depreciation and amortisation, payments to affiliated health  
30 organisations and grant and subsidy costs.  
31  
32  
33  
34  
35  
36  
37  
38  
39

40 A Generalized Linear Model (GLM) regression with a log link and gamma error term will be  
41 performed on the costs to determine independent predictors of acute care costs. Variables for the  
42 severity of the injury such as the ICD 10<sup>th</sup> revision-based Injury Severity Scores (ICISS),  
43 Charlson Co-morbidity Index and the level of injury (cervical, thoracic or lumbar regions) will  
44 be included in the model to adjust for the heterogeneity between the patients. Sensitivity  
45 analysis will be used to account for the excess costs incurred by co-morbidities not attributable to  
46 TSCI; decreasing costs by percentage figure relative to the presence of co-morbidities at the time  
47  
48  
49  
50  
51  
52  
53  
54  
55  
56  
57



1  
2  
3 of the TSCI. Variation in activity-based costs will be explored to highlight areas of resource use  
4 that require further investigation, similar to research conducted recently across the NSW Trauma  
5 Service, using this approach <sup>16</sup>.  
6  
7

8  
9  
10 *2. To describe the incidence of potentially preventable complications in patients with acute TSCI*  
11 *and the associated incremental healthcare costs.*  
12  
13

14 Potentially preventable complications (such as pressure ulcers or urinary tract infections) related  
15 to the TSCI and within the index admission will be identified within the ICD-10-AM codes, pre-  
16 defined according to published data <sup>17</sup> and listed in Appendix 2. Subsequent re-admissions from  
17 the index admission and within the study period will be scrutinised to determine any ongoing  
18 injury sequelae including potentially preventable complications. Readmissions within 30 days  
19 from first acute discharge will be principally identified as unplanned readmissions. The cost of  
20 these secondary complications will be estimated using the NSW DNR data and AR-DRG codes  
21 recorded for each episode of care.  
22  
23  
24  
25  
26  
27  
28  
29  
30  
31

32  
33 *3. To benchmark actual patient pathways and care against the best-practice standards previously*  
34 *defined through a modified e-Delphi process and other sources, quantifying financial costs*  
35 *associated with deviation of care from these standards.*  
36  
37  
38  
39

40 The patient clinical care pathway will be mapped from the scene of injury to definitive care,  
41 incorporating numbers of hospital transfers, hospital specific factors describing healthcare  
42 utilisation, length of stay, hospital level and their location. This mapping will be compared with  
43 the best-practice care standards defined by the modified e-Delphi process<sup>18</sup> and current state  
44 based guidelines for the management of major trauma, to determine the clinical pathway  
45 components reflecting optimal timing and care. This comparison will permit factors potentially  
46 associated with unwarranted clinical variation for patients with TSCI to be identified.  
47  
48  
49  
50  
51  
52  
53  
54  
55  
56  
57

1  
2  
3 A gap driver analysis will aim to identify drivers of cost and clinical pathway differences and  
4 will consider factors including delayed and/or multiple transfers, delays in timing of surgery,  
5  
6 lack of admission to specialist TSCI services and the occurrence of secondary complications. A  
7  
8 range of controllable and uncontrollable factors will be measured against the best practice  
9  
10 standards. Multilevel regression analysis will be performed to determine patient-level, and  
11  
12 hospital-level factors associated with cost variability.  
13  
14  
15

16  
17 4. *To estimate and compare the cost-effectiveness of treatment pathway options, and propose a*  
18  
19 *cost-effective clinical pathway*  
20

21 Decision-analytic modelling will be used to build a cost-effective clinical pathway closely  
22 emulating the best-practice standards. A decision tree will be modelled based on the observed  
23 hospital costs, admissions, readmissions, mortality and complications data from the linked health  
24 records, Australian life tables, previously mapped care pathways, incidence rates and previously  
25 published literature. Total resource use calculated will include the costs for admissions,  
26 complications, emergency department visits, surgery, readmissions and diagnostic services, and  
27 will be estimated for the analysis and presented in Australian dollars. Relevant internal validity  
28 measures will be undertaken to affirm the validity of the model<sup>19</sup>. A cost-effectiveness analysis  
29 will be conducted to compare the proposed/modelled care pathway against the current care  
30 practices identified in the record linked data, from the perspective of the healthcare provider. The  
31 model will utilize the study population and the study settings described above over a period of 12  
32 months post-injury for the evaluation. Service utilisation data attached to each unique health  
33 record will be extracted and analysed based on the relevance of AR-DRG codes to the ICD-10  
34 codes of interest. Cost weights associated with each AR-DRG will be adjusted for differences for  
35 each financial year during the entire study period. All cost data will be inflated or deflated as  
36  
37  
38  
39  
40  
41  
42  
43  
44  
45  
46  
47  
48  
49  
50  
51  
52  
53  
54  
55  
56  
57

1  
2  
3 required using the published health deflators and a discount rate of 5% will be used in the  
4  
5 evaluation. The Quality Adjusted Life Years (QALYs) for each treatment arm for the modelling  
6  
7 will be derived from follow up interview self-reports from the patients in the nested Access to  
8  
9 Care study, combined with estimates from similarly published literature.

10  
11  
12 These utility measures will be subject to probabilistic sensitivity analysis along with other key  
13  
14 parameters in the model over a wide range based on clinical judgement and existing literature.

15  
16  
17 The incremental cost effectiveness ratios (ICERs) will be estimated to compare the interventions  
18  
19 using the expected costs and effects from the decision analytic modelling exercise. A cost-  
20  
21 effectiveness (CE) plane will be used to plot the ICER and the uncertainty will be represented by  
22  
23 confidence ellipses, which are a two dimensional representation of the confidence intervals<sup>20</sup>.

24  
25  
26 All the data analyses will be conducted using Stata software (version 15.0 STATA Corporation,  
27  
28 College Station, TX, USA) and the decision analytic modelling will be conducted using the  
29  
30 Treeage Pro software (2017 Version R2).

### 31 32 33 **Patient and public involvement**

34  
35  
36 The study will use de-identified record linked health data and will not involve any patients or  
37  
38 public for this study.

### 39 40 41 **ETHICS AND DISSEMINATION**

42  
43  
44 Ethics approval has been obtained from the NSW Population and Health Services Research  
45  
46 Ethics Committee. The Access to Care study database contains 202 patients who have consented  
47  
48 to access to their medical records, this dataset was identified for the purpose of record linkage  
49  
50 and returned de-identified. Dissemination of research findings to key stakeholders is envisaged  
51  
52 through peer reviewed publications in scientific journals, conference proceedings and  
53  
54

collaborator meetings. The study is ideally placed to establish standards, reduce costs with potential for research translation across the state of NSW.

## DISCUSSION

The long-term impact of TSCI on our health care system is significant and ongoing. Deficits in clinical policy and practice can significantly impact the extent of long term disability and resultant quality of life for patients with TSCI, thereby escalating personal and health care system economic costs. Identification of specific deficits in system performance will facilitate application of targeted improvement strategies, aiming for greater efficiency of our services, focused resource use, highest standard of practice and consequently optimal outcomes. This study is ideally placed to establish standards, reduce costs and translate evidence back to the bedside.

A particular challenge envisaged in this study is the mapping of patient pathways, which may reveal many routes with multiple interactions within the healthcare system. Many individual routes can be defined based on the initial diagnosis, geographical location and the transition pathway. However, to be useful for the analysis, these pathways will need to be aggregated into a manageable number of broader pathways guided primarily by existing policy directives to pre-hospital and acute care services. Particular limitations are envisaged with the study design; firstly, the costs are limited to the acute care episode, and direct social care costs or indirect costs from loss of productivity to patients or caregivers are not included. This therefore underestimates the financial impact of TSCI to society as a whole. Despite all the efforts to accurately describe all cost elements of acute care, the possibility of some resources not being captured cannot be excluded. However, we anticipate this aspect at least to be uniform across all subgroups or pathways and not significantly affect the research findings as most of the resources will be

1  
2  
3 accounted for in the costing exercise. Patients with major trauma will have other immediate  
4 healthcare needs in addition to spinal cord injury management and may follow a pathway best  
5 suited to patient needs rather than the best practice pathway. We anticipate adjusting for some of  
6 this variation by conducting a sensitivity analysis with a group of patients with an isolated spinal  
7 cord injury and including measures for patient injury severity, co-morbidity and multiple trauma  
8 in the analyses.  
9  
10  
11  
12  
13  
14  
15

16  
17  
18  
19 This study proposes to describe the costs of acute care, including those identified as attributable  
20 to potentially preventable complications. Care pathway deviations from best practice will be  
21 described, such as delayed surgery or delayed admission to SCIU for patients with TSCI.  
22  
23 Importantly, we aim to quantify the degree to which variation in clinical practice and  
24 institutional performance impacts on patient outcomes and acute care costs and is amenable to  
25 change. These findings are likely to have significant clinical consequences for the patient, cost  
26 implications for the health service <sup>21</sup> and offers significant potential to make amenable  
27 recommendations for improvement.  
28  
29  
30  
31  
32  
33  
34  
35  
36  
37

### 38 **List of abbreviations**

39  
40  
41 APDC - NSW admitted patient data collection  
42

43  
44 AR-DRG - Australian refined diagnostic related group  
45

46  
47 EDDC - NSW emergency department data collection  
48

49  
50 ICD-10-AM - International classification of diseases – tenth revision, Australian modification  
51

52  
53 ICER - Incremental cost effectiveness ratio  
54

55  
56 NSW - New South Wales  
57

58 15  
59  
60

1  
2  
3 QALY – Quality adjusted life years  
4

5  
6 SCI - Spinal cord injury  
7

8  
9 SCIU – Spinal cord injury unit  
10

11  
12 TSCI - Traumatic spinal cord injury  
13  
14

## 15 REFERENCES

- 16 1. Access Economics. The economic cost of spinal cord injury and traumatic brain injury in Australia. Access Economics for the Victorian Neurotrauma Initiative. Canberra, 2009.
- 17 2. Australian Bureau of Statistics. Consumer Price Index. Canberra: [www.abs.gov.au](http://www.abs.gov.au), 2017.
- 18 3. Norton L. Spinal Cord Injury, Australia, 2007-08: Australian Institute of Health and Welfare Canberra, 2010.
- 19 4. Minei J, Fabian T, Guffey M, et al. Increased Trauma Center Volume Is Associated With Improved Survival After Severe Injury: Results of a Resuscitation Outcomes Consortium Study. *Annals of Surgery* 2014;260(3):456-65.
- 20 5. New PW, Baxter D, Farry A, et al. Estimating the Incidence and Prevalence of Traumatic Spinal Cord Injury in Australia. *Archives of Physical Medicine and Rehabilitation* 2015;96(1):76-83. doi: <https://doi.org/10.1016/j.apmr.2014.08.013>
- 21 6. Spinal Cord Injuries Australia. SCI Statistics NSW: SCIA; 2017 [Available from: <https://scia.org.au/health-and-sci-facts/sci-statistics> accessed 05/10/2017 2017.
- 22 7. Middleton JM, Sharwood LN, Cameron P, et al. Right care, right time, right place: improving outcomes for people with spinal cord injury through early access to intervention and improved access to specialised care: study protocol. *BMC health services research* 2014;14(1):600.
- 23 8. Munce SE, Wodchis W, Guilcher SJ, et al. Direct costs of adult traumatic spinal cord injury in Ontario. *Spinal Cord* 2013;51(1):64.
- 24 9. DeVivo MJ. Causes and costs of spinal cord injury in the United States. *Spinal Cord* 1997;35(12):809-13.
- 25 10. Middleton P, Davies S, Anand S, et al. The pre-hospital epidemiology and management of spinal cord injuries in New South Wales: 2004–2008. *Injury* 2012;43(4):480-85.
- 26 11. Mac-Thiong J-M, Feldman DE, Thompson C, et al. Does timing of surgery affect hospitalization costs and length of stay for acute care following a traumatic spinal cord injury? *Journal of neurotrauma* 2012;29(18):2816-22.
- 27 12. Rackauskas Z, Lapteva O, Rocka S. Timing of Surgery for Neurologically Compromised Traumatic Cervical Spine Injuries. *Journal of Neurological Surgery Part A: Central European Neurosurgery* 2016;77(05):427-31.
- 28 13. Fehlings MG, Vaccaro A, Wilson JR, et al. Early versus delayed decompression for traumatic cervical spinal cord injury: results of the Surgical Timing in Acute Spinal Cord Injury Study (STASCIS). *PLoS one* 2012;7(2):e32037.
- 29 14. Graves N, Zheng H. Modelling the direct health care costs of chronic wounds in Australia. *Wound Practice & Research: Journal of the Australian Wound Management Association* 2014;22(1):20.
- 30 15. Australian Government. AIHW, ed. Biennial health report of the Australian Institute of Health and Welfare. Australia's Health 2014. Canberra, 2014.

31  
32  
33  
34  
35  
36  
37  
38  
39  
40  
41  
42  
43  
44  
45  
46  
47  
48  
49  
50  
51  
52  
53  
54  
55  
56  
57  
58 16  
59

16. Curtis K, Lam M, Mitchell R, et al. Major trauma: the unseen financial burden to trauma centres, a descriptive multicentre analysis. *Australian Health Review* 2014;38(1):30-37.
17. Middleton J, Lim K, Taylor L, et al. Patterns of morbidity and rehospitalisation following spinal cord injury. *Spinal Cord* 2004;42:359-67.
18. Sharwood L, Stanford R, Middleton J, et al. Improving care standards for patients with spinal trauma combining a modified e-Delphi process and stakeholder interviews: a study protocol. *BMJ Open* 2017:e012377. doi: doi:10.1136/bmjopen-2016-012377
19. McCabe C, Dixon S. Testing the validity of cost-effectiveness models. *Pharmacoeconomics* 2000;17(5):501-13.
20. Petrou S, Gray A. Economic evaluation alongside randomised controlled trials: design, conduct, analysis, and reporting. *Bmj* 2011;342:d1548.
21. Grimshaw JM, Eccles MP, Lavis JN, et al. Knowledge translation of research findings. *Implementation science* 2012;7(1):50.

## DECLARATIONS

1  
2  
3 Ethics: Ethics approval for this study has been grant NSW Population & Health Services  
4  
5 Research Ethics Committee on 17 August 2016 (AU RED REF: HREC/16/CIPHS/19).  
6

7  
8 Availability of data and materials: The data used in this protocol cannot be shared with any other  
9  
10 researchers unless approved by the relevant data custodians at the Centre for Health Record  
11  
12 Linkage.  
13

14  
15 Contributorship statement: LNS is the principal investigator for this funded study and was  
16  
17 principally responsible for the conception and design of this study and the acquisition of the  
18  
19 record linkage data. JWM, PM, JP, IDC and JW provided substantial intellectual content during  
20  
21 the study design. JWM is the principal investigator for the Access to Care study. LNS is the  
22  
23 principal investigator for the Delphi process project. BPV wrote the first draft of the manuscript  
24  
25 and co-ordinated commentary and review for subsequent revisions. All authors contributed to the  
26  
27 critical review and approval of the final manuscript.  
28  
29

30  
31 Funding: This project is funded by grants from the Ramsay Research & Teaching Fund and  
32  
33 icare™. LNS is funded by icare™ and the John Walsh Centre for Rehabilitation Research. This  
34  
35 study forms part of a research higher degree project of the primary author supported by icare™  
36  
37 and The University of Sydney.  
38  
39

40  
41 Acknowledgements: We would like to acknowledge the contributions of Professor Luke  
42  
43 Connelly to the review of this manuscript.  
44

45  
46 Competing interests: The authors declare that they have no competing interests.  
47  
48  
49  
50  
51  
52  
53  
54  
55  
56  
57



## APPENDIX 1

The dataset combined all patients for whom one of the following ICD-10-AM (International Classification of Diseases – Tenth Revision, Australian Modification) codes have been identified in any separation, and in any position of the diagnostic code list within the NSW Admitted Patient Data Collection (APDC):

S12, S12.0, S12.1, S12.2, S12.21, S12.22, S12.23, S12.24, S12.25, S12.7, S12.8, S12.9, S13.1, S13.10, S13.11, S13.12, S13.13, S13.14, S13.15, S13.16, S13.17, S13.18, S13.2, S13.3, S14.0, S14.10, S14.11, S14.12, S14.13, S14.70, S14.71, S14.72, S14.73, S14.74, S14.75, S14.76, S14.77, S14.78, S22.0, S22.00, S22.01, S22.02, S22.03, S22.04, S22.05, S22.06, S22.1, S24.0, S24.1, S24.10, S24.11, S24.12, S24.7, S24.70, S24.71, S24.72, S24.73, S24.74, S24.75, S24.76, S24.77, S32, S32.0, S32.00, S32.01, S32.02, S32.03, S32.04, S32.05, S34.0, S34.1, S34.3, S34.70, S34.71, S34.72, S34.73, S34.74, S34.75, S34.76, T06.0, T06.1, T09.3.

## APPENDIX 2

### List of complications and ICD 10 codes

| Complication                          | ICD 10 codes                   |
|---------------------------------------|--------------------------------|
| Urinary tract infection               | N30, N39                       |
| Hydronephrosis, hydro-ureter          | N13                            |
| Other disorders of bladder            | N31                            |
| Urethritis                            | N34, N37                       |
| Haematuria                            | R31                            |
| Other urinary complication            | N99.8, N99.9                   |
| Decubitus ulcers (pressure ulcer)     | L89                            |
| Pneumonitis due to solids and liquids | J69                            |
| Tracheostomy complication             | J95.0                          |
| Urinary retention/incontinence        | R33, R32, N39.4, N39.3         |
| Pneumonia, pulmonary collapse         | J12, J14, J15, J17, J18, J98.1 |
| Pleurisy                              | R09.1, J86.9, J86.0, J90       |
| Respiratory failure                   | J96.9, J96.0, J96.1            |
