# Supplementary material for: Assessing the impact of care pathways on potentially preventable complications and costs for spinal trauma patients: protocol for a data linkage study using cohort study and administrative data
Source: PubMed Central journal article supplement — BMJ Open. 2018 Nov 8;8(11):e023785. doi: 10.1136/bmjopen-2018-023785 (PMC6231591; doi:10.1136/bmjopen-2018-023785), 2018-11-08
Supplement: bmjopen-2018-023785supp001.pdf [file bmjopen-2018-023785supp001.pdf]

## APPENDIX 1

The dataset combined all patients for whom one of the following ICD-10-AM (International Classification of Diseases – Tenth Revision, Australian Modification) codes have been identified in any separation, and in any position of the diagnostic code list within the NSW Admitted Patient Data Collection (APDC):

S12, S12.0, S12.1, S12.2, S12.21, S12.22, S12.23, S12.24, S12.25, S12.7, S12.8, S12.9, S13.1, S13.10, S13.11, S13.12, S13.13, S13.14, S13.15, S13.16, S13.17, S13.18, S13.2, S13.3, S14.0, S14.10, S14.11, S14.12, S14.13, S14.70, S14.71, S14.72, S14.73, S14.74, S14.75, S14.76, S14.77, S14.78, S22.0, S22.00, S22.01, S22.02, S22.03, S22.04, S22.05, S22.06, S22.1, S24.0, S24.1, S24.10, S24.11, S24.12, S24.7, S24.70, S24.71, S24.72, S24.73, S24.74, S24.75, S24.76, S24.77, S32, S32.0, S32.00, S32.01, S32.02, S32.03, S32.04, S32.05, S34.0, S34.1, S34.3, S34.70, S34.71, S34.72, S34.73, S34.74, S34.75, S34.76, T06.0, T06.1, T09.3.

## APPENDIX 2

### List of complications and ICD 10 codes

| Complication                          | ICD 10 codes                   |
|---------------------------------------|--------------------------------|
| Urinary tract infection               | N30, N39                       |
| Hydronephrosis, hydro-ureter          | N13                            |
| Other disorders of bladder            | N31                            |
| Urethritis                            | N34, N37                       |
| Haematuria                            | R31                            |
| Other urinary complication            | N99.8, N99.9                   |
| Decubitus ulcers (pressure ulcer)     | L89                            |
| Pneumonitis due to solids and liquids | J69                            |
| Tracheostomy complication             | J95.0                          |
| Urinary retention/incontinence        | R33, R32, N39.4, N39.3         |
| Pneumonia, pulmonary collapse         | J12, J14, J15, J17, J18, J98.1 |
| Pleurisy                              | R09.1, J86.9, J86.0, J90       |
| Respiratory failure                   | J96.9, J96.0, J96.1            |
